# Supplementary material for: Liquid–liquid phase separation in organic particles containing one and two organic species: importance of the average O : C
Source: Copernicus journal article supplement (doi:10.5194/acp-18-12075-2018), 2018-08-22
Supplement: Supplementary file 1 [file acp-18-12075-2018-supplement.zip]

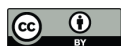

## *Supplement of*

# **Liquid–liquid phase separation in organic particles containing one and two organic species: importance of the average O : C**

**Mijung Song et al.**

*Correspondence to:* Allan K. Bertram ([bertram@chem.ubc.ca](mailto:bertram@chem.ubc.ca))

- [acp-18-12075-2018-supplement-title-page.pdf](#)
- [Movie S1. diethyl sebacate for increasing RH.avi](#)
- [Movie S10. glyceryl tributyrate\\_polyethylene glycol-400 for decreasing RH.avi](#)
- [Movie S11. diethyl sebacate\\_polyethylene glycol-400 for decreasing RH.avi](#)
- [Movie S12. Polypropylene glycol\\_polyethylene glycol-400 for decreasing RH.avi](#)
- [Movie S2. Glyceryl tributyrate for increasing RH.avi](#)
- [Movie S3. suberic acid monomethyl ester for increasing RH.avi](#)
- [Movie S4. diethyl sebacate for decreasing RH.avi](#)
- [Movie S5. Glyceryl tributyrate for decreasing RH.avi](#)
- [Movie S6. suberic acid monomethyl ester for decreasing RH.avi](#)
- [Movie S7. glyceryl tributyrate\\_polyethylene glycol-400 for increasing RH.avi](#)
- [Movie S8. diethyl sebacate\\_polyethylene glycol-400 for increasing RH.avi](#)
- [Movie S9. Polypropylene glycol\\_polyethylene glycol-400 for increasing RH.avi](#)
- [SI\\_LLPS in one and two organics\\_Song\\_submitted.docx](#)

The copyright of individual parts of the supplement might differ from the CC BY 4.0 License.
